# Supplementary material
Source: PubMed Central journal article supplement (PMC2742870)

# Leow\_Sppl\_Fig1

Klf6<sup>ff</sup> Nkx 3.1<sup>+/+</sup>

Klf6<sup>ff</sup> Nkx 3.1<sup>Cre/+</sup>

Klf6<sup>ff</sup> Nkx 3.1<sup>+/+</sup>

Klf6<sup>ff</sup> Nkx 3.1<sup>Cre/+</sup>

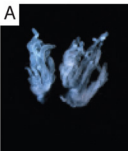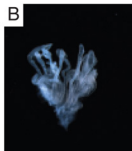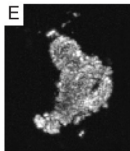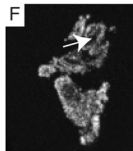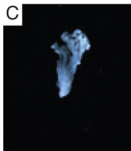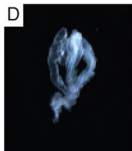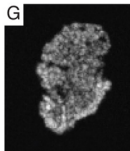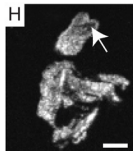

DP

VP

Klf6<sup>f/f</sup>Nkx 3.1<sup>+/+</sup>Klf6<sup>f/f</sup>Nkx 3.1<sup>Cre/+</sup>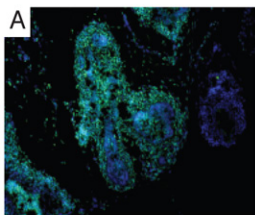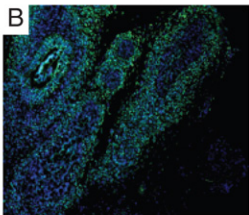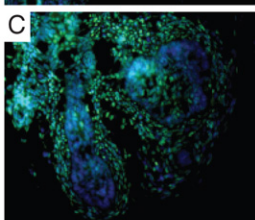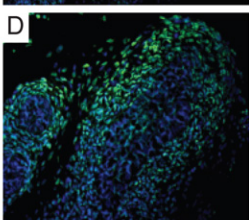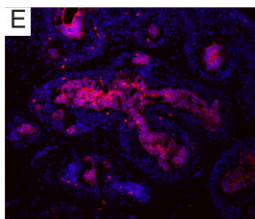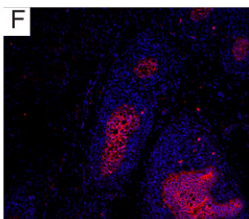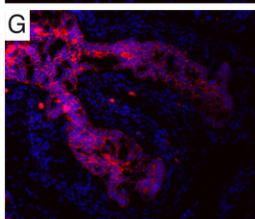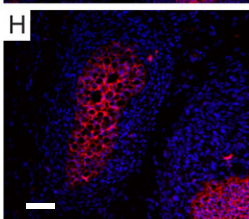

AR/DAPI

E-Cadherin/DAPI

$Klf6^{f/f}Nkx3.1^{+/+}$

$Klf6^{f/f}Nkx3.1^{Cre/+}$

CK8/Ki67/DAPI

CK8/CK14/DAPI

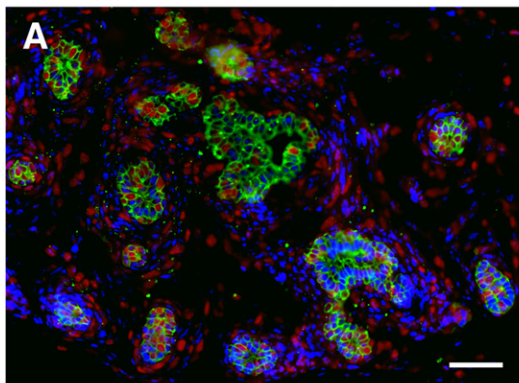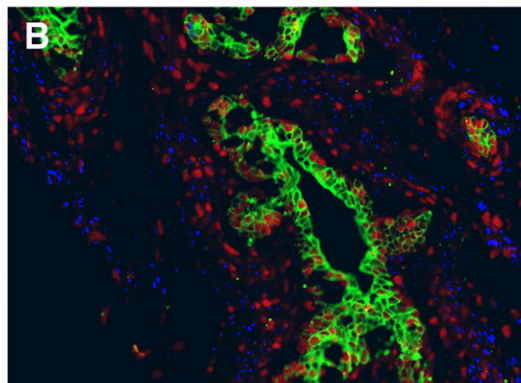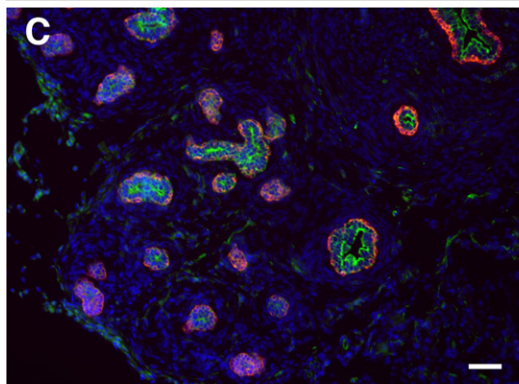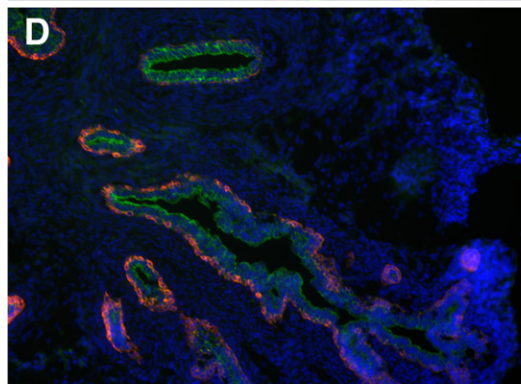

Supplement: supp_M109.001776_jbc.M109.001776-1.pdf [file supp_M109.001776_jbc.M109.001776-1.pdf]
